# Supplementary material for: Functional constraints on tetrapod feeding ecology were released long after terrestrialisation
Source: Research Square preprint supplement (doi:10.21203/rs.3.rs-3914124/v1), 2024-02-20
Supplement: Supplementary file 1 [file 09277821bb96ba33519e769e.xlsx]

## Sheet: Sheet1
ID	Genus	FAD	LAD	Clade	Amniote/Anamniote	Environmental Ecology	Deitary Ecology	Image File	Image Source	Image Type
1	Acanthostega	Famennian	Famennian	Stem Tetrapoda	Anamniote	Semi-Aquatic	Carnivore	Acanthostega.tif	Ahlberg and Clack (1998)	Reconstruction
2	Acanthostomatops	Sakmarian	Sakmarian	Temnospondyli	Anamniote	Terrestrial	Carnivore	Acanthostomatops.tif	Boy (1989)	Reconstruction
3	Adelogyrinus	Visean	Serpukhovian	Stem Tetrapoda	Anamniote	Aquatic	Carnivore	Adelogyrinus.tif	Carroll et al. (1998)	Reconstruction
4	Adelospondylus	Serpukhovian	Bashkirian	Stem Tetrapoda	Anamniote	Aquatic	Carnivore	Adelospondylus.tif	Smithson (1980)	Specimen Drawing
5	Aerosaurus	Gzhelian	Wordian	Eupelycosauria	Amniote	Terrestrial	Carnivore	Aerosaurus.tif	Spindler et al. (2018)	Reconstruction
6	Aletrimyti	Kungurian	Kungurian	Microsauria	Anamniote	Terrestrial	Carnivore	Aletrimyti.tif	Szostakiwskyj et al. (2015)	µCT Scan
7	Anteosaurus	Capitanian	Capitanian	Eupelycosauria	Amniote	Terrestrial	Carnivore	Anteosaurus.tif	Barghusen (1975)	Reconstruction
8	Anthracosaurus	Moscovian	Moscovian	Embolomeri	Anamniote	Semi-Aquatic	Carnivore	Anthracosaurus.tif	Panchen (1981)	Reconstruction
9	Araeoscelis	Kungurian	Kungurian	Eureptilia	Amniote	Terrestrial	Carnivore	Araeoscelis.tif	Reisz et al. (1984)	Reconstruction
10	Archaeovenator	Gzhelian	Asselian	Eupelycosauria	Amniote	Terrestrial	Carnivore	Archaeovenator.tif	Spindler et al. (2018)	Reconstruction
11	Archegosaurus	Asselian	Asselian	Temnospondyli	Anamniote	Aquatic	Carnivore	Archegosaurus.tif	Romer (1947)	Reconstruction
12	Archeria	Artinskian	Kungurian	Embolomeri	Anamniote	Aquatic	Carnivore	Archeria.tif	Holmes (1989)	Specimen Drawing
13	Arctognathus	Wuchiapingian	Changhsingian	Eupelycosauria	Amniote	Terrestrial	Carnivore	Arctognathus.tif	Sidor (2003)	Reconstruction
14	Ariekanerpeton	Asselian	Wuchiapingian	Seymouriamorpha	Anamniote	Semi-Aquatic	Unassigned	Ariekanerpeton.tif	Klembara and Ruta (2005)	Reconstruction
15	Ascendonanus	Sakmarian	Kungurian	Eupelycosauria	Amniote	Terrestrial	Carnivore	Ascendonanus.tif	Spindler et al. (2018)	Reconstruction
16	Balanerpeton	Visean	Serpukhovian	Temnospondyli	Anamniote	Semi-Aquatic	Carnivore	Balanerpeton.tif	Ahlberg and Clack (1998)	Reconstruction
17	Banksiops	Changhsingian	Changhsingian	Temnospondyli	Anamniote	Semi-Aquatic	Carnivore	Banksiops.tif	Cosgriff (1969)	Reconstruction
18	Batrachiderpeton	Moscovian	Moscovian	Nectridea	Anamniote	Aquatic	Unassigned	Batrachiderpeton.tif	Hancock and Atthey (1913)	Specimen Drawing
19	Belebey	Wordian	Wordian	Parareptilia	Amniote	Terrestrial	Unassigned	Belebey.tif	Reisz et al. (2007)	Reconstruction
20	Biarmosuchus	Wordian	Capitanian	Eupelycosauria	Amniote	Terrestrial	Carnivore	Biarmosuchus.tif	Sidor (2003)	Reconstruction
21	Brachydectes	Moscovian	Kungurian	Microsauria	Anamniote	Semi-Aquatic	Unassigned	Brachydectes.tif	Pardo and Anderson (2016)	µCT Scan
22	Caerorhachis	Serpukhovian	Bashkirian	Stem Tetrapoda	Anamniote	Terrestrial	Carnivore	Caerorhachis.tif	Holmes and Carroll (1977)	Reconstruction
23	Captorhinus	Artinskian	Kungurian	Eureptilia	Amniote	Terrestrial	Carnivore	Captorhinus.tif	Ahlberg and Clack (1998)	Reconstruction
24	Cardiocephalus	Kungurian	Kungurian	Microsauria	Anamniote	Semi-Aquatic	Unassigned	Cardiocephalus.tif	Carroll and Gaskill (1978)	Reconstruction
25	Carrolla	Artinskian	Kungurian	Microsauria	Anamniote	Semi-Aquatic	Unassigned	Carrolla.tif	Maddin et al. (2011)	Reconstruction
26	Casea	Kungurian	Kungurian	Caseasauria	Amniote	Terrestrial	Herbivore	Casea.tif	Williston (1913)	Reconstruction
27	Cheliderpeton	Asselian	Asselian	Temnospondyli	Anamniote	Semi-Aquatic	Carnivore	Cheliderpeton.tif	Schoch and Milner (2000)	Reconstruction
28	Chomatobatrachus	Changhsingian	Changhsingian	Temnospondyli	Anamniote	Semi-Aquatic	Carnivore	Chomatobatrachus.tif	Schoch and Milner (2000)	Reconstruction
29	Cochleosaurus	Moscovian	Moscovian	Temnospondyli	Anamniote	Semi-Aquatic	Carnivore	Cochleosaurus.tif	Sequiera (2003)	Specimen Drawing
30	Colobomycter	Artinskian	Roadian	Parareptilia	Amniote	Terrestrial	Carnivore	Colobomycter.tif	MacDougall et al. (2017)	Reconstruction
31	Coloraderpeton	Moscovian	Moscovian	Aistopoda	Anamniote	Semi-Aquatic	Unassigned	Coloraderpeton.tif	Pardo et al. (2017)	µCT Scan
32	Cotylorhynchus	Gzhelian	Wordian	Caseasauria	Amniote	Terrestrial	Herbivore	Cotylorhynchus.tif	Reisz (2006)	Reconstruction
33	Crassigyrinus	Visean	Bashkirian	Stem Tetrapoda	Anamniote	Aquatic	Carnivore	Crassigyrinus.tif	Ahlberg and Clack (1998)	Specimen Drawing
34	Ctenospondylus	Artinskian	Kungurian	Eupelycosauria	Amniote	Terrestrial	Carnivore	Ctenospondylus.tif	Brink and Reisz (2014)	Reconstruction
35	Delorhynchus	Artinskian	Roadian	Parareptilia	Amniote	Terrestrial	Unassigned	Delorhynchus.tif	Haridy et al. (2017)	Specimen Photograph
36	Deltasaurus	Changhsingian	Changhsingian	Temnospondyli	Anamniote	Semi-Aquatic	Carnivore	Deltasaurus.tif	Cosgriff (1965)	Reconstruction
37	Deltavjatia	Capitanian	Changhsingian	Parareptilia	Amniote	Terrestrial	Herbivore	Deltavjatia.tif	Tsuji (2013)	Specimen Photograph
38	Dendrerpeton	Bashkirian	Moscovian	Temnospondyli	Anamniote	Semi-Aquatic	Carnivore	Dendrerpeton.tif	Godfrey et al. (1986)	Reconstruction
39	Densignathus	Famennian	Famennian	Stem Tetrapoda	Anamniote	Semi-Aquatic	Carnivore	Densignathus.tif	Daeschler (2000)	Reconstruction
40	Desmatodon	Kasimovian	Kasimovian	Diadectomorpha	Amniote	Terrestrial	Herbivore	Desmatodon.tif	Kissel (2010)	Reconstruction
41	Diadectes	Asselian	Roadian	Diadectomorpha	Amniote	Terrestrial	Herbivore	Diadectes.tif	Welles (1941)	Reconstruction
42	Diictodon	Wuchiapingian	Changhsingian	Eupelycosauria	Amniote	Terrestrial	Herbivore	Diictodon.tif	Sidor (2003)	Reconstruction
43	Dimetrodon	Artinskian	Roadian	Eupelycosauria	Amniote	Terrestrial	Carnivore	Dimetrodon.tif	Fröbisch et al. (2011)	Reconstruction
44	Diploceraspis	Sakmarian	Sakmarian	Nectridea	Anamniote	Aquatic	Unassigned	Diploceraspis.tif	Beerbower (1963)	Reconstruction
45	Doragnathus	Serpukhovian	Bashkirian	Stem Tetrapoda	Anamniote	Aquatic	Unassigned	Doragnathus.tif	Anderson et al. (2013)	Reconstruction
46	Dvellacanus	Kungurian	Kungurian	Microsauria	Anamniote	Semi-Aquatic	Carnivore	Dvellacanus.tif	Szostakiwskyj et al. (2015)	µCT Scan
47	Dvinosaurus	Capitanian	Wuchiapingian	Temnospondyli	Anamniote	Semi-Aquatic	Carnivore	Dvinosaurus.tif	Romer (1947)	Reconstruction
48	Edaphosaurus	Gzhelian	Kungurian	Eupelycosauria	Amniote	Terrestrial	Herbivore	Edaphosaurus.tif	Reisz (2006)	Reconstruction
49	Elginerpeton	Frasnian	Frasnian	Stem Tetrapoda	Anamniote	Aquatic	Carnivore	Elginerpeton.tif	Ahlberg and Clack (1998)	Reconstruction
50	Ennatosaurus	Roadian	Wordian	Caseasauria	Amniote	Terrestrial	Herbivore	Ennatosaurus.tif	Maddin et al. (2008)	Reconstruction
51	Eodicynodon	Wordian	Wordian	Eupelycosauria	Amniote	Terrestrial	Herbivore	Eodicynodon.tif	Kemp (2005)	Reconstruction
52	Eoherpeton	Bashkirian	Bashkirian	Embolomeri	Anamniote	Terrestrial	Unassigned	Eoherpeton.tif	Smithson (1980)	Reconstruction
53	Eothyris	Artinskian	Kungurian	Caseasauria	Amniote	Terrestrial	Carnivore	Eothyris.tif	Reisz et al. (2009)	Reconstruction
54	Eryops	Artinskian	Kungurian	Temnospondyli	Anamniote	Terrestrial	Carnivore	Eryops.tif	Schoch and Milner (2014)	Reconstruction
55	Euryodus	Kungurian	Kungurian	Microsauria	Anamniote	Semi-Aquatic	Unassigned	Euryodus.tif	Carroll and Gaskill (1978)	Reconstruction
56	Eusthenopteron	Givetian	Givetian	Stem Tetrapoda	Anamniote	Aquatic	Carnivore	Eusthenopteron.tif	Clack (2012)	Reconstruction
57	Greererpeton	Serpukhovian	Serpukhovian	Stem Tetrapoda	Anamniote	Aquatic	Carnivore	Greererpeton.tif	Bolt and Lombard (2001)	Reconstruction
58	Hapsidopareion	Kungurian	Kungurian	Microsauria	Anamniote	Semi-Aquatic	Unassigned	Hapsidopareion.tif	Carroll et al. (1998)	Reconstruction
59	Haptodus	Artinskian	Kungurian	Eupelycosauria	Amniote	Terrestrial	Carnivore	Haptodus.tif	Kemp (2005)	Reconstruction
60	Hylerpeton	Bashkirian	Moscovian	Microsauria	Anamniote	Semi-Aquatic	Unassigned	Hylerpeton.tif	Carroll et al. (1998)	Reconstruction
61	Ichthyostega	Famennian	Famennian	Stem Tetrapoda	Anamniote	Semi-Aquatic	Carnivore	Ichthyostega.tif	Ahlberg and Clack (1998)	Reconstruction
62	Ictidosuchoides	Wuchiapingian	Changhsingian	Eupelycosauria	Amniote	Terrestrial	Carnivore	Ictidosuchoides.tif	Sidor (2003)	Reconstruction
63	Intasuchus	Kungurian	Kungurian	Temnospondyli	Anamniote	Semi-Aquatic	Carnivore	Intasuchus.tif	Schoch and Milner (2000)	Reconstruction
64	Jarilinus	Capitanian	Changhsingian	Unassigned	Unassigned	Terrestrial	Unassigned	Jarilinus.tif	Carroll et al. (1972)	Reconstruction
65	Kotlassia	Capitanian	Changhsingian	Seymouriamorpha	Anamniote	Terrestrial	Unassigned	Kotlassia.tif	Romer (1947)	Reconstruction
66	Labidosaurikos	Kungurian	Kungurian	Eureptilia	Amniote	Terrestrial	Herbivore	Labidosaurikos.tif	Reisz (2006)	Reconstruction
67	Labidosaurus	Kungurian	Roadian	Eureptilia	Amniote	Terrestrial	Herbivore	Labidosaurus.tif	Modesto et al. (2007)	Reconstruction
68	Leiocephalikon	Moscovian	Moscovian	Microsauria	Anamniote	Semi-Aquatic	Unassigned	Leiocephalikon.tif	Carroll et al. (1998)	Reconstruction
69	Leontosaurus	Wuchiapingian	Wuchiapingian	Eupelycosauria	Amniote	Terrestrial	Carnivore	Leontosaurus.tif	Kammerer (2016)	Specimen Photograph
70	Lethiscus	Visean	Visean	Aistopoda	Anamniote	Semi-Aquatic	Unassigned	Lethiscus.tif	Pardo et al. (2017)	Reconstruction
71	Limnoscelis	Gzhelian	Asselian	Diadectomorpha	Amniote	Terrestrial	Carnivore	Limnoscelis.tif	Kissel (2010)	Reconstruction
72	Lydekkerina	Changhsingian	Changhsingian	Temnospondyli	Anamniote	Terrestrial	Carnivore	Lydekkerina.tif	Schoch and Milner (2000)	Reconstruction
73	Lystrosaurus	Changhsingian	Changhsingian	Eupelycosauria	Amniote	Terrestrial	Herbivore	Lystrosaurus.tif	Kemp (2005)	Reconstruction
74	Megalocephalus	Bashkirian	Moscovian	Stem Tetrapoda	Anamniote	Aquatic	Carnivore	Megalocephalus.tif	Romer (1947)	Reconstruction
75	Megamolgophis	Gzhelian	Sakmarian	Microsauria	Anamniote	Semi-Aquatic	Unassigned	Megamolgophis.tif	Lucas (2013)	Reconstruction
76	Melosaurus	Wordian	Wordian	Temnospondyli	Anamniote	Semi-Aquatic	Carnivore	Melosaurus.tif	Riabinin (1916)	Reconstruction
77	Mesenosaurus	Roadian	Capitanian	Eupelycosauria	Amniote	Terrestrial	Carnivore	Mesenosaurus.tif	Spindler et al. (2018)	Reconstruction
78	Mesosaurus	Artinskian	Kungurian	Parareptilia	Amniote	Aquatic	Carnivore	Mesosaurus.tif	Modesto (2006)	Reconstruction
79	Metaxygnathus	Famennian	Famennian	Stem Tetrapoda	Anamniote	Aquatic	Carnivore	Metaxygnathus.tif	Ahlberg and Clack (1998)	Reconstruction
80	Micraroter	Kungurian	Kungurian	Microsauria	Anamniote	Semi-Aquatic	Unassigned	Micraroter.tif	Carroll et al. (1998)	Reconstruction
81	Microbrachis	Moscovian	Moscovian	Microsauria	Anamniote	Semi-Aquatic	Carnivore	Microbrachis.tif	Carroll et al. (1998)	Specimen Drawing
82	Microvaranops	Capitanian	Capitanian	Eupelycosauria	Amniote	Terrestrial	Unassigned	Microvaranops.tif	Spindler et al. (2018)	Reconstruction
83	Moradisaurus	Changhsingian	Changhsingian	Eureptilia	Amniote	Terrestrial	Herbivore	Moradisaurus.tif	Modesto et al. (2019)	Specimen Photograph
84	Moschops	Wuchiapingian	Wuchiapingian	Eupelycosauria	Amniote	Terrestrial	Herbivore	Moschops.tif	Boos et al. (2015)	Reconstruction
85	Neldasaurus	Sakmarian	Kungurian	Temnospondyli	Anamniote	Semi-Aquatic	Carnivore	Neldasaurus.tif	Chase (1965)	Specimen Drawing
86	Oedaleops	Gzhelian	Wordian	Caseasauria	Amniote	Terrestrial	Unassigned	Oedaleops.tif	Langston (1965)	Reconstruction
87	Oestocephalus	Bashkirian	Kasimovian	Aistopoda	Anamniote	Semi-Aquatic	Carnivore	Oestocephalus.tif	Carroll et al. (1998)	Reconstruction
88	Onchiodon	Sakmarian	Sakmarian	Temnospondyli	Anamniote	Semi-Aquatic	Carnivore	Onchiodon.tif	Boy (1990)	Reconstruction
89	Ophiacodon	Sakmarian	Kungurian	Eupelycosauria	Amniote	Terrestrial	Carnivore	Ophiacodon.tif	Sidor (2003)	Reconstruction
90	Orovenator	Artinskian	Artinskian	Eureptilia	Amniote	Terrestrial	Carnivore	Orovenator.tif	Reisz et al. (2011)	Reconstruction
91	Palaeohatteria	Artinskian	Kungurian	Eupelycosauria	Amniote	Terrestrial	Carnivore	Palaeohatteria.tif	Spindler (2016)	Reconstruction
92	Paleothyris	Moscovian	Kasimovian	Eureptilia	Amniote	Terrestrial	Carnivore	Paleothyris.tif	Carroll (1969)	Reconstruction
93	Panderichthys	Frasnian	Frasnian	Stem Tetrapoda	Anamniote	Aquatic	Carnivore	Panderichthys.tif	Ahlberg and Clack (1998)	Specimen Drawing
94	Pantelosaurus	Artinskian	Kungurian	Eupelycosauria	Amniote	Terrestrial	Carnivore	Pantelosaurus.tif	Spindler (2016)	Reconstruction
95	Pantylus	Artinskian	Kungurian	Microsauria	Anamniote	Semi-Aquatic	Carnivore	Pantylus.tif	Carroll et al. (1998)	Reconstruction
96	Pareiasaurus	Wuchiapingian	Wuchiapingian	Parareptilia	Amniote	Terrestrial	Herbivore	Pareiasaurus.tif	Olson and Broom (1937)	Specimen Drawing
97	Petrolacosaurus	Kasimovian	Gzhelian	Eureptilia	Amniote	Terrestrial	Carnivore	Petrolacosaurus.tif	Reisz (1981)	Reconstruction
98	Phlegethontia	Bashkirian	Kungurian	Aistopoda	Anamniote	Semi-Aquatic	Carnivore	Phlegethontia.tif	Carroll et al. (1998)	Reconstruction
99	Pholiderpeton	Bashkirian	Moscovian	Embolomeri	Anamniote	Semi-Aquatic	Carnivore	Pholiderpeton.tif	Panchen (1970)	Specimen Drawing
100	Pholidogaster	Visean	Serpukhovian	Embolomeri	Anamniote	Semi-Aquatic	Carnivore	Pholidogaster.tif	Romer (1964)	Reconstruction
101	Platycephalichthys	Givetian	Givetian	Stem Tetrapoda	Anamniote	Aquatic	Carnivore	Platycephalichthys.tif	Anderson et al. (2013)	Reconstruction
102	Platyoposaurus	Wordian	Wordian	Temnospondyli	Anamniote	Semi-Aquatic	Carnivore	Platyoposaurus.tif	Schoch and Milner (2000)	Reconstruction
103	Protocaptorhinus	Artinskian	Kungurian	Eureptilia	Amniote	Terrestrial	Herbivore	Protocaptorhinus.tif	Olson (1984)	Reconstruction
104	Protorothyris	Asselian	Asselian	Eureptilia	Amniote	Terrestrial	Unassigned	Protorothyris.tif	Kemp (2005)	Reconstruction
105	Pteroplax	Bashkirian	Moscovian	Embolomeri	Anamniote	Semi-Aquatic	Unassigned	Pteroplax.tif	Romer (1947)	Reconstruction
106	Ptyonius	Moscovian	Moscovian	Nectridea	Anamniote	Semi-Aquatic	Unassigned	Ptyonius.tif	Carroll et al. (1998)	Reconstruction
107	Reiszorhinus	Artinskian	Kungurian	Eureptilia	Amniote	Terrestrial	Herbivore	Reiszorhinus.tif	Sumida et al. (2010)	Specimen Drawing
108	Rhineceps	Wuchiapingian	Wuchiapingian	Temnospondyli	Anamniote	Semi-Aquatic	Carnivore	Rhineceps.tif	Schoch and Milner (2000)	Reconstruction
109	Rhizodus	Visean	Gzhelian	Stem Tetrapoda	Anamniote	Aquatic	Carnivore	Rhizodus.tif	Jeffery (2003)	Specimen Drawing
110	Rhynchonkos	Kungurian	Kungurian	Microsauria	Anamniote	Semi-Aquatic	Carnivore	Rhynchonkos.tif	Szostakiwskyj et al. (2015)	µCT Scan
111	Sauropleura	Moscovian	Moscovian	Nectridea	Anamniote	Semi-Aquatic	Unassigned	Sauropleura.tif	Carroll et al. (1998)	Reconstruction
112	Schoenfelderpeton	Asselian	Asselian	Temnospondyli	Anamniote	Semi-Aquatic	Carnivore	Schoenfelderpeton.tif	Boy (1986)	Specimen Drawing
113	Sclerocephalus	Asselian	Asselian	Temnospondyli	Anamniote	Semi-Aquatic	Carnivore	Sclerocephalus.tif	Schoch and Milner (2000)	Reconstruction
114	Secodontosaurus	Artinskian	Kungurian	Eupelycosauria	Amniote	Terrestrial	Carnivore	Secodontosaurus.tif	Reisz et al. (1992)	Reconstruction
115	Seymouria	Kungurian	Kungurian	Seymouriamorpha	Anamniote	Terrestrial	Carnivore	Seymouria.tif	Romer (1947)	Reconstruction
116	Silvanerpeton	Visean	Visean	Unassigned	Unassigned	Terrestrial	Carnivore	Silvanerpeton.tif	Ruta and Clack (2006)	Reconstruction
117	Solenodonsaurus	Moscovian	Moscovian	Unassigned	Unassigned	Terrestrial	Unassigned	Solenodonsaurus.tif	Carroll et al. (1972)	Reconstruction
118	Sphenacodon	Asselian	Wordian	Eupelycosauria	Amniote	Terrestrial	Carnivore	Sphenacodon.tif	Fröbisch et al. (2011)	Reconstruction
119	Suminia	Capitanian	Changhsingian	Eupelycosauria	Amniote	Terrestrial	Herbivore	Suminia.tif	Reisz (2006)	Reconstruction
120	Syodon	Kungurian	Changhsingian	Eupelycosauria	Amniote	Terrestrial	Carnivore	Syodon.tif	Kammerer (2011)	Specimen Photograph
121	Tetraceratops	Kungurian	Kungurian	Eupelycosauria	Amniote	Terrestrial	Unassigned	Tetraceratops.tif	Kemp (2005)	Reconstruction
122	Tiktaalik	Frasnian	Frasnian	Stem Tetrapoda	Anamniote	Aquatic	Carnivore	Tiktaalik.tif	Daeschler et al. (2006)	Specimen Photograph
123	Titanophoneus	Wordian	Wordian	Eupelycosauria	Amniote	Terrestrial	Carnivore	Titanophoneus.tif	Barghusen (1975)	Reconstruction
124	Trimerorhachis	Artinskian	Kungurian	Temnospondyli	Anamniote	Aquatic	Carnivore	Trimerorhachis.tif	Schoch and Milner (2014)	Reconstruction
125	Tryphosuchus	Wordian	Changhsingian	Temnospondyli	Anamniote	Semi-Aquatic	Carnivore	Tryphosuchus.tif	Schoch and Milner (2000)	Reconstruction
126	Tseajaia	Asselian	Wordian	Diadectomorpha	Amniote	Terrestrial	Herbivore	Tseajaia.tif	Kissel (2010)	Reconstruction
127	Ulemosaurus	Wordian	Capitanian	Eupelycosauria	Amniote	Terrestrial	Herbivore	Ulemosaurus.tif	Sidor (2003)	Reconstruction
128	Urocordylus	Bashkirian	Moscovian	Nectridea	Anamniote	Aquatic	Unassigned	Urocordylus.tif	Carroll et al. (1998)	Reconstruction
129	Utegenia	Asselian	Kungurian	Seymouriamorpha	Anamniote	Semi-Aquatic	Unassigned	Utegenia.tif	Klembara and Ruta (2004)	Reconstruction
130	Varanodon	Roadian	Wordian	Eupelycosauria	Amniote	Terrestrial	Carnivore	Varanodon.tif	Spindler et al. (2018)	Reconstruction
131	Varanops	Kungurian	Kungurian	Eupelycosauria	Amniote	Terrestrial	Carnivore	Varanops.tif	Spindler et al. (2018)	Reconstruction
132	Varanosaurus	Kungurian	Kungurian	Eupelycosauria	Amniote	Terrestrial	Carnivore	Varanosaurus.tif	Reisz (2006)	Reconstruction
133	Ventastega	Famennian	Famennian	Stem Tetrapoda	Anamniote	Aquatic	Carnivore	Ventastega.tif	Ahlberg and Clack (1998)	Specimen Drawing
134	Weigeltisaurus	Wuchiapingian	Wuchiapingian	Eureptilia	Amniote	Terrestrial	Unassigned	Weigeltisaurus.tif	Bulanov and Sennikov (2015)	Reconstruction
135	Whatcheeria	Visean	Visean	Stem Tetrapoda	Anamniote	Semi-Aquatic	Carnivore	Whatcheeria.tif	Lombard and Bolt (2006)	Specimen Drawing
136	Ymeria	Frasnian	Famennian	Stem Tetrapoda	Anamniote	Semi-Aquatic	Carnivore	Ymeria.tif	Clack et al. (2012)	Reconstruction
137	Zatrachys	Sakmarian	Kungurian	Temnospondyli	Anamniote	Terrestrial	Carnivore	Zatrachys.tif	Langston (1953)	Reconstruction
